# Supplementary material
Source: PubMed Central journal article supplement (PMC5658761)
Supplement: oc7b00303_si_001.pdf [file oc7b00303_si_001.pdf]

## Supporting Information

### Retrosynthetic reaction prediction using neural sequence-to-sequence models

Bowen Liu<sup>1</sup>, Bharath Ramsundar<sup>2</sup>, Prasad Kawthekar<sup>2</sup>, Jade Shi<sup>1</sup>, Joseph Gomes<sup>1</sup>, Quang Luu Nguyen<sup>1</sup>, Stephen Ho<sup>1</sup>, Jack Sloane<sup>1</sup>, Paul Wender<sup>1,3</sup>, Vijay Pande<sup>1,2,4</sup>

<sup>1</sup> Department of Chemistry, Stanford University, Stanford, CA 94305, USA

<sup>2</sup> Department of Computer Science, Stanford University, Stanford, CA 94305, USA

<sup>3</sup> Department of Chemical and Systems Biology, Stanford University, Stanford, CA 94305, USA

<sup>4</sup> Department of Structural Biology, Stanford University, Stanford, CA 94305, USA

Email: [pande@stanford.edu](mailto:pande@stanford.edu)

The neural network model, processed datasets and evaluation code will be made available at:  
[https://github.com/pandegroup/reaction\\_prediction\\_seq2seq.git](https://github.com/pandegroup/reaction_prediction_seq2seq.git)

Table S1: Key hyperparameters of the seq2seq model

|                                   |        |
|-----------------------------------|--------|
| <b>General</b>                    |        |
| Batch size                        | 32     |
| Optimizer                         | Adam   |
| Learning rate                     | 0.0001 |
| Max gradient norm                 | 5.0    |
| Max sequence length               | 140    |
| Attention dim                     | 512    |
| <b>Bidirectional LSTM encoder</b> |        |
| # layers                          | 2      |
| Embedding dim                     | 512    |
| Dropout (keep)                    | 0.8    |
| <b>LSTM decoder</b>               |        |
| # layers                          | 4      |
| Embedding dim                     | 512    |
| Dropout (keep)                    | 0.8    |
| Max decode length                 | 140    |

Table S2: Beam search statistics. A completed candidate sequence contains an end of sequence character. The seq2seq beam search inference was performed on a system containing an Intel i7-7700K CPU and a NVIDIA GTX 1080 Ti GPU, using the GPU

|                                                | <b>beam size</b> |      |      |       |       |
|------------------------------------------------|------------------|------|------|-------|-------|
|                                                | 3                | 5    | 10   | 20    | 50    |
| <b>average # of complete candidates</b>        | 2.93             | 4.84 | 9.56 | 19.26 | 48.34 |
| <b># examples with all candidates complete</b> | 4700             | 4330 | 3679 | 3511  | 3314  |
| <b># examples with no candidates complete</b>  | 5                | 3    | 3    | 0     | 0     |
| <b>inference time gpu (s)</b>                  | 443              | 465  | 487  | 691   | 712   |

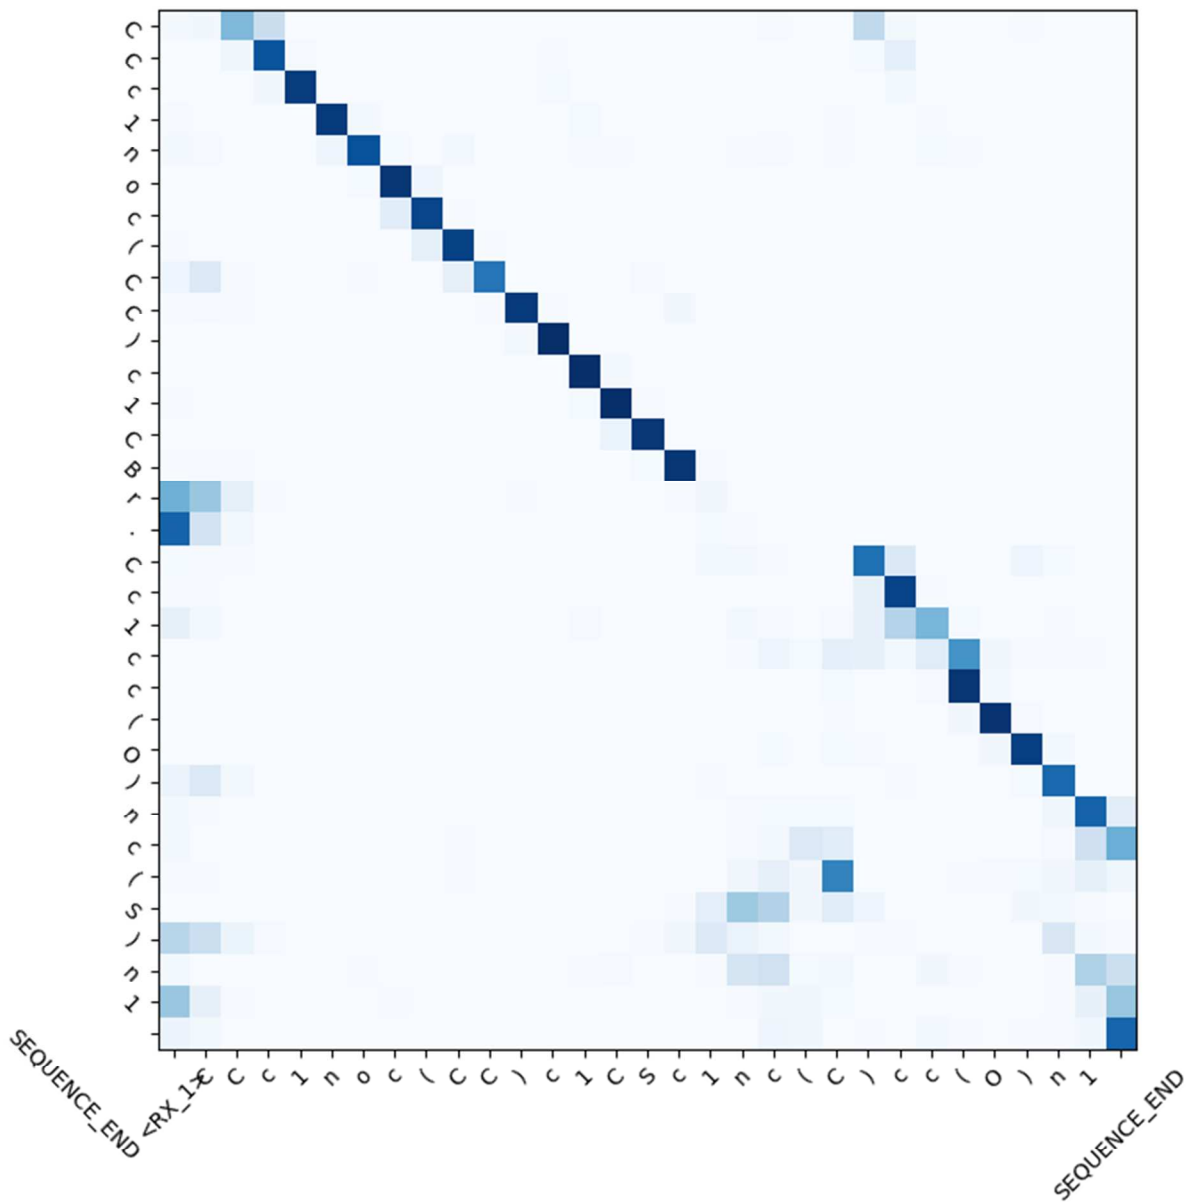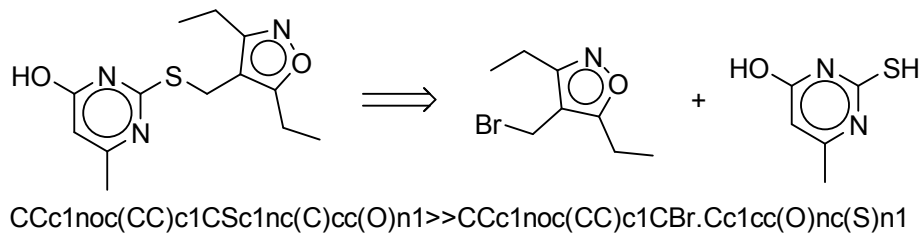

Figure S1: Attention weights for a reaction class 1 (Heteroatom alkylation and arylation) example. Note that for Figures S1-S10, darker blue represents larger attention weights. The input sequence characters (reaction type and target molecule) are along the x axis, and the output sequence characters (predicted reactants) are along the y axis

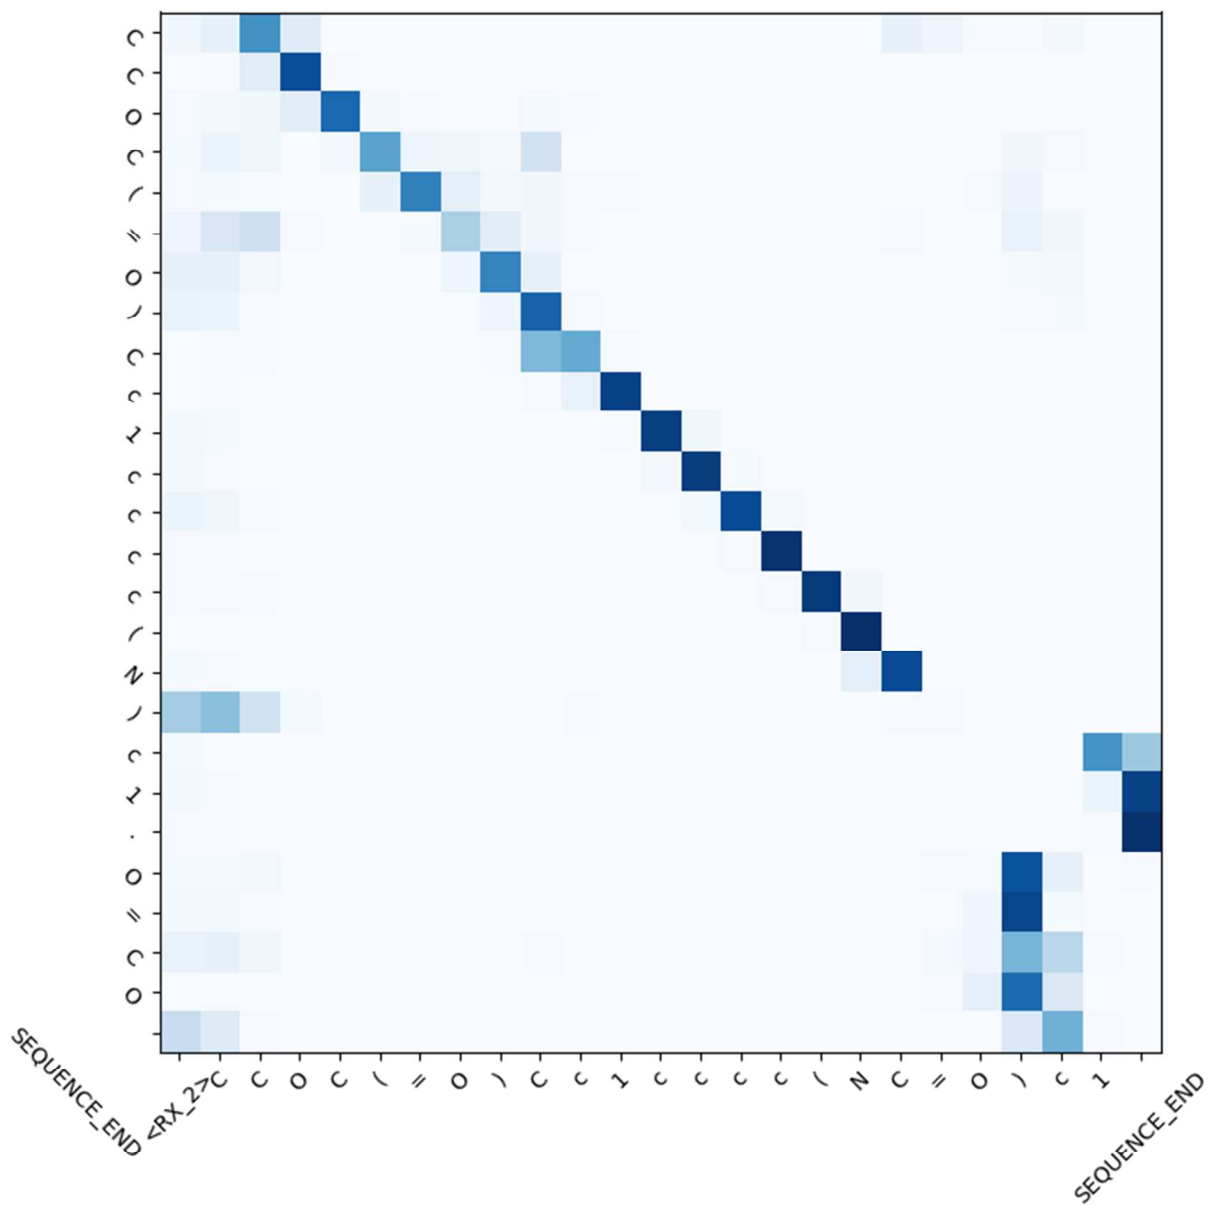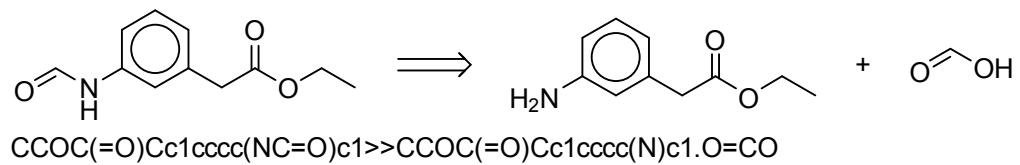

Figure S2: Attention weights for a reaction class 2 (Acylation and related processes) example

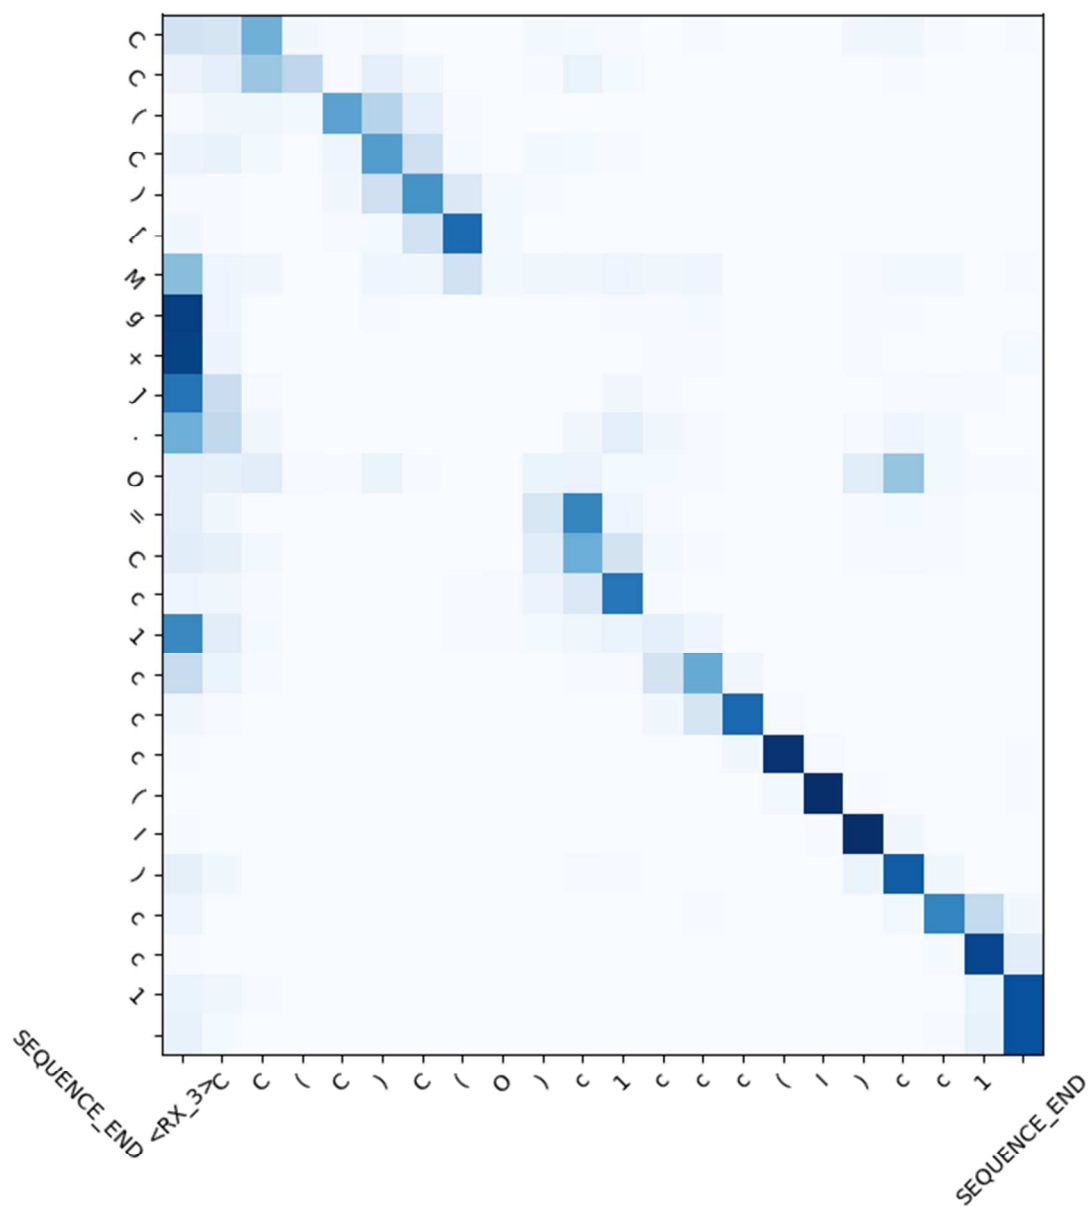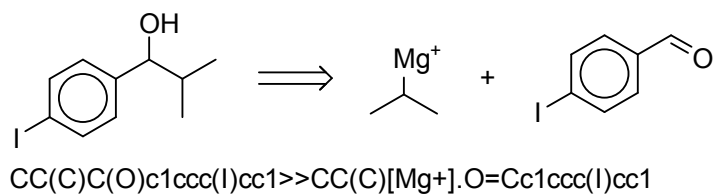

Figure S3: Attention weights for a reaction class 3 (C-C bond formation) example



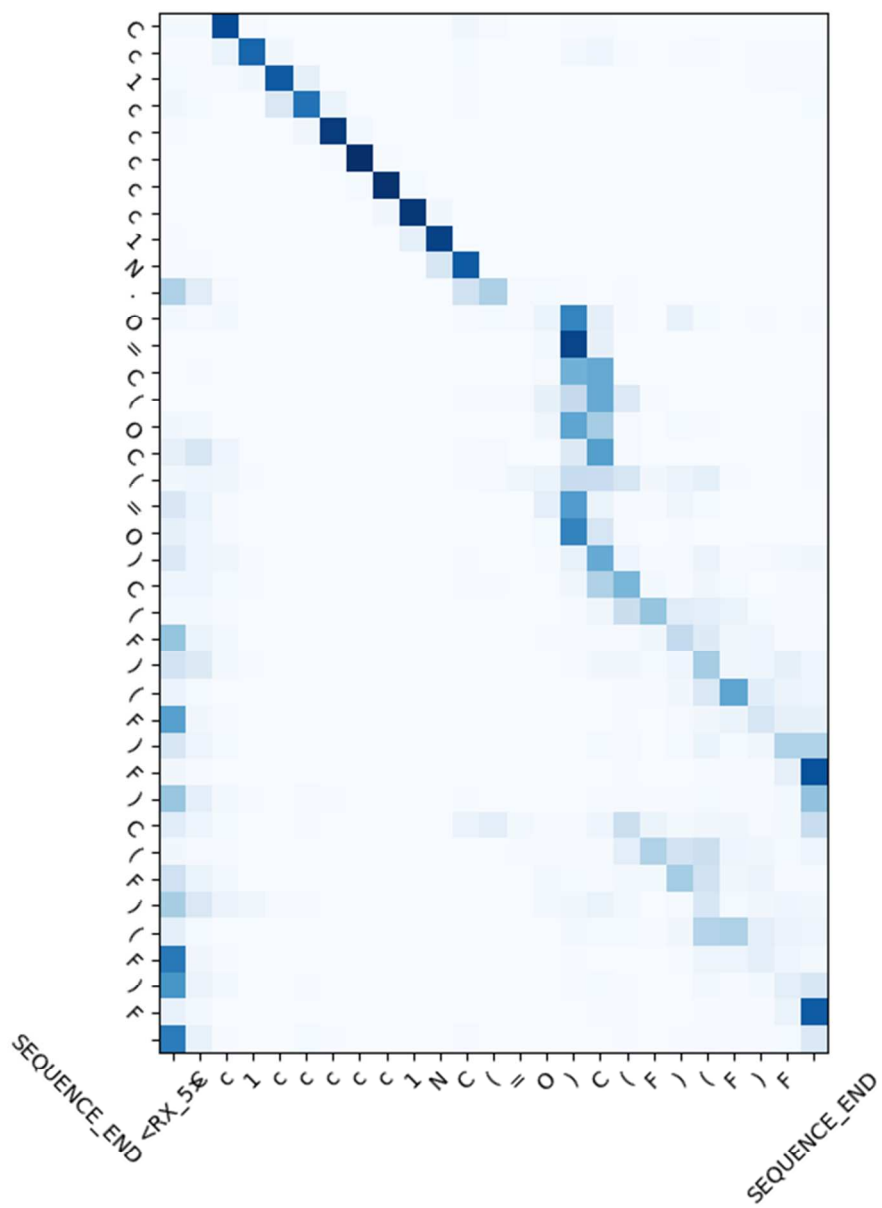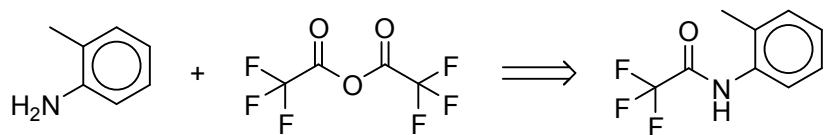

Cc1ccccc1N.O=C(OC(=O)C(F)(F)F)C(F)(F)F>>Cc1ccccc1NC(=O)C(F)(F)F

Figure S5: Attention weights for a reaction class 5 (Protections) example

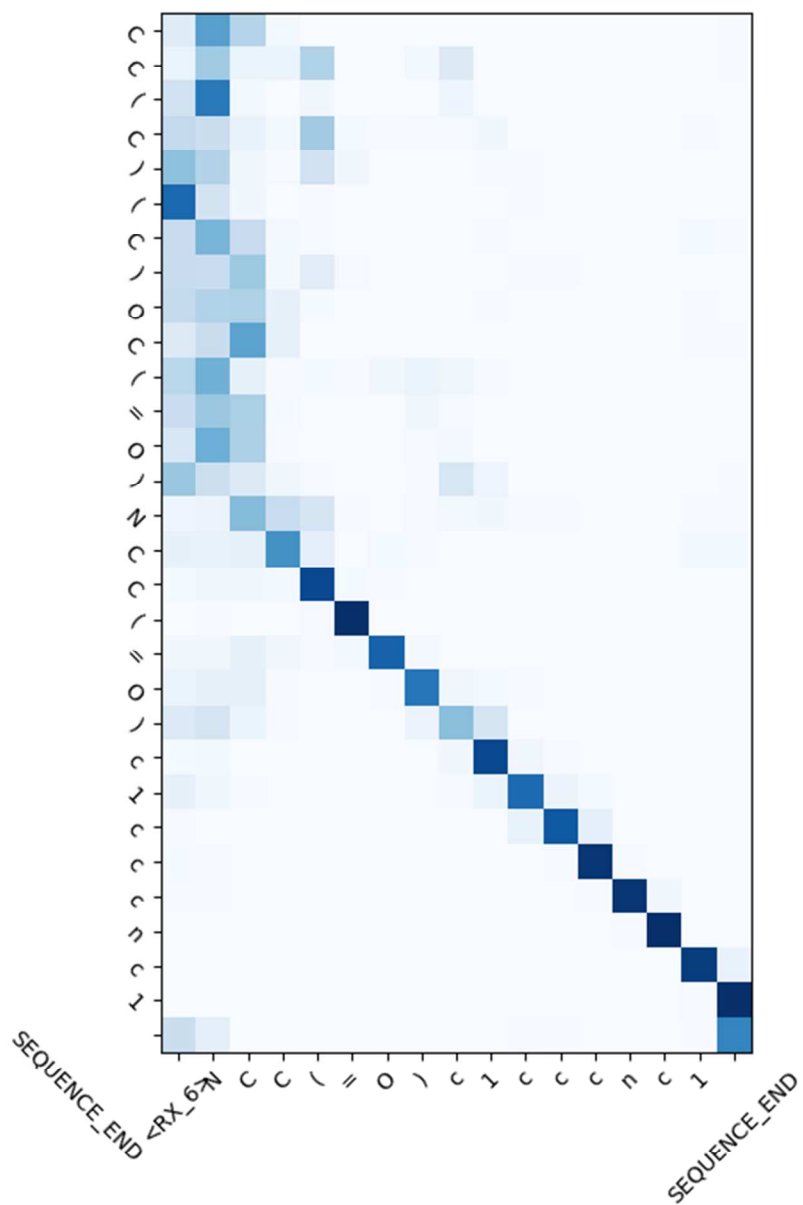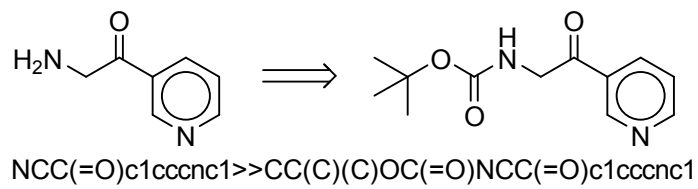

Figure S6: Attention weights for a reaction class 6 (Deprotections) example







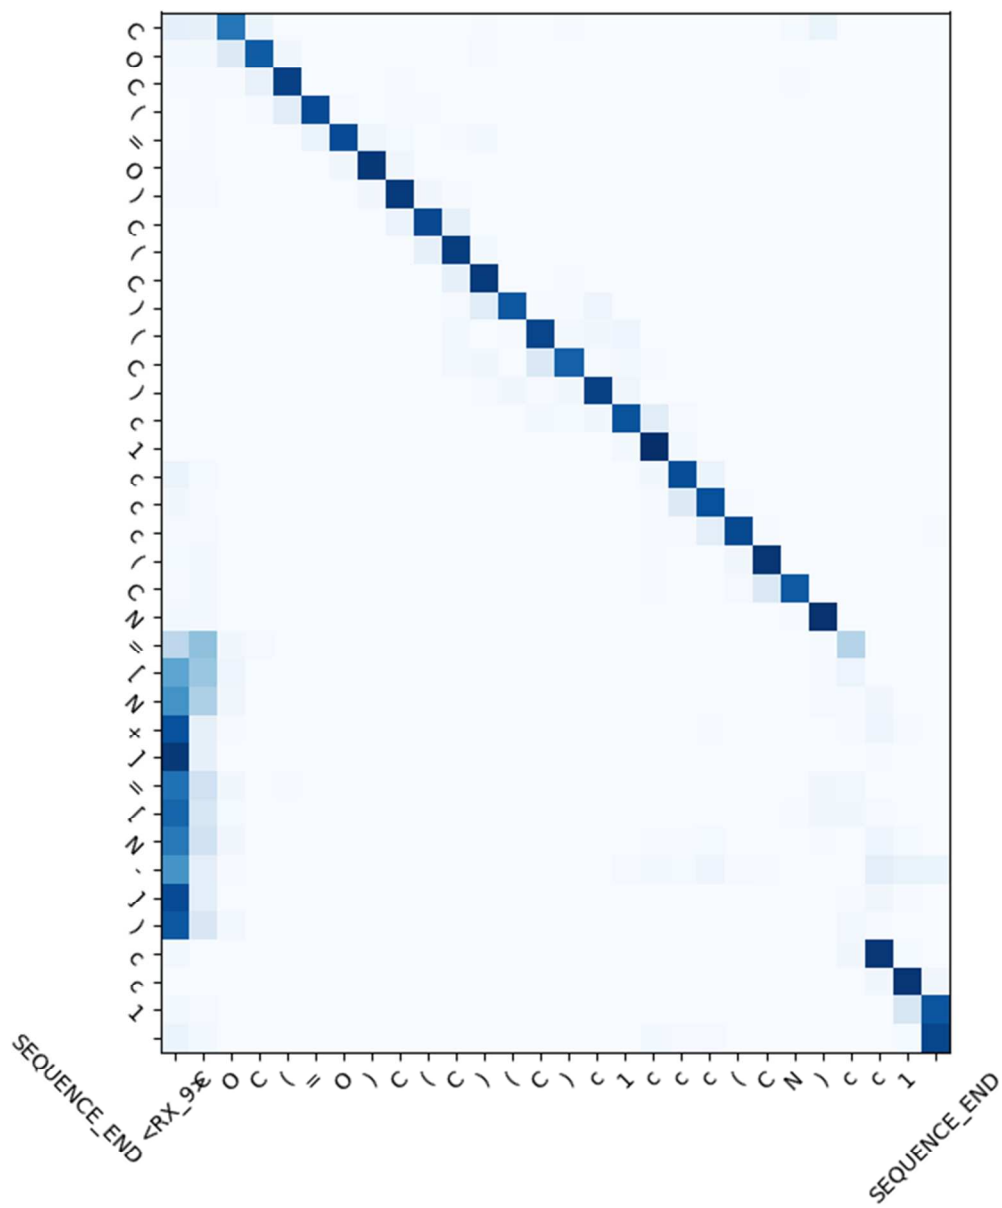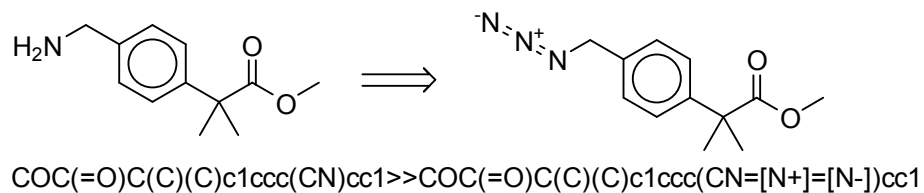

Figure S9: Attention weights for a reaction class 9 (Functional group interconversion) example

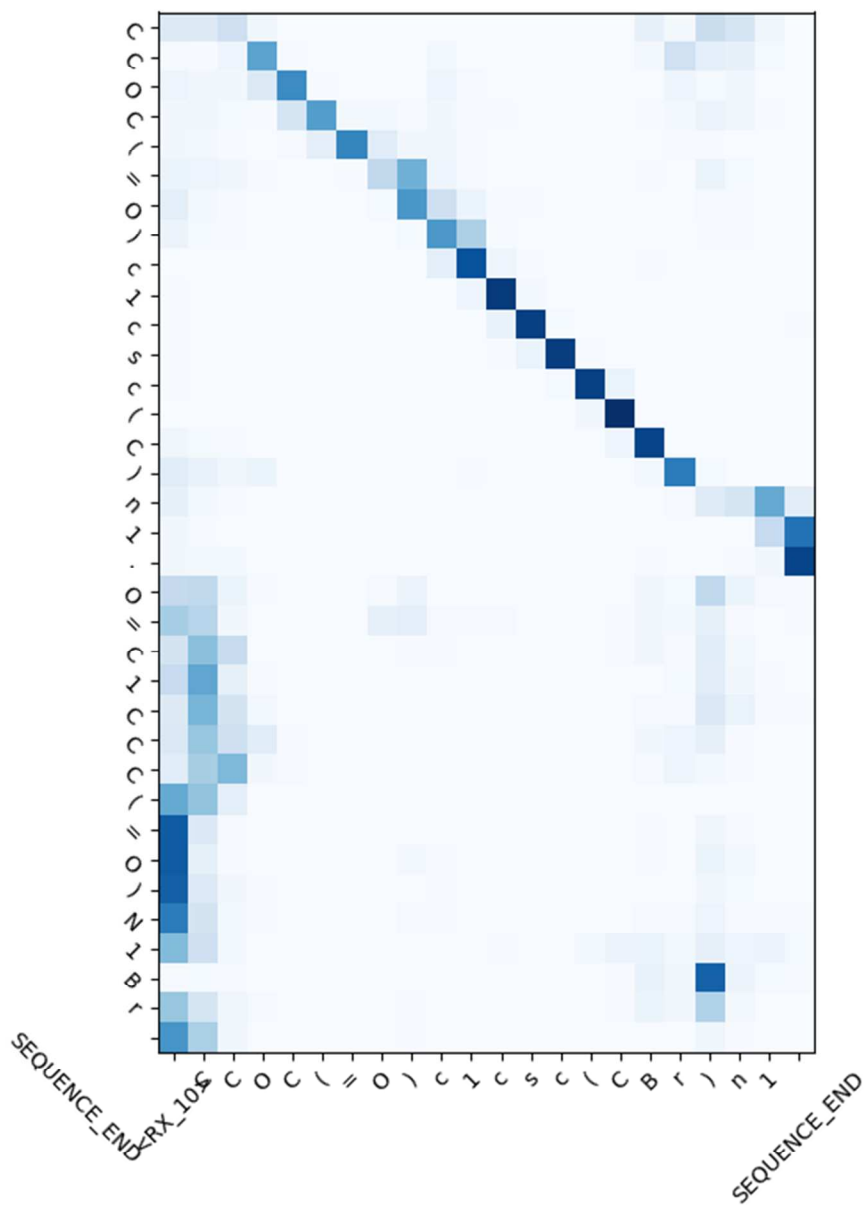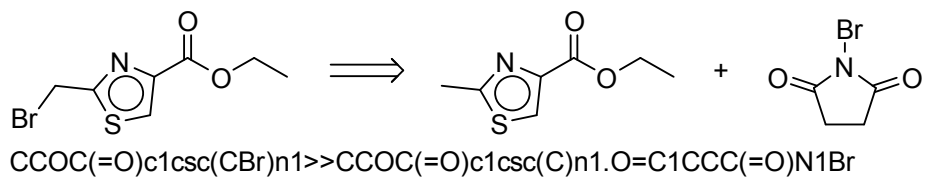

Figure S10: Attention weights for a reaction class 10 (Functional group addition) example
